**S4 Table: Summary statistics from evaluation against the null model, in prominent and randomly-sampled scientists across fields.**

| Population                   | Model      | Test statistic ( $\downarrow$ ) | $p$ -value              |
|------------------------------|------------|---------------------------------|-------------------------|
| Physics (prominent)          | kNN        | 3864.0                          | $2.87 \times 10^{-35*}$ |
|                              | Prototype  | 4116.0                          | $1.43 \times 10^{-33*}$ |
|                              | Progenitor | 4956.0                          | $1.75 \times 10^{-28*}$ |
|                              | Exemplar   | 2100.0                          | $1.41 \times 10^{-47*}$ |
|                              | Local      | 5292.0                          | $1.43 \times 10^{-26*}$ |
| Chemistry (prominent)        | kNN        | 1740.0                          | $4.99 \times 10^{-28*}$ |
|                              | Prototype  | 1680.0                          | $2.60 \times 10^{-28*}$ |
|                              | Progenitor | 2760.0                          | $5.46 \times 10^{-19*}$ |
|                              | Exemplar   | 960.0                           | $1.25 \times 10^{-35*}$ |
|                              | Local      | 2640.0                          | $6.30 \times 10^{-20*}$ |
| Medicine (prominent)         | kNN        | 2642.0                          | $2.25 \times 10^{-35*}$ |
|                              | Prototype  | 2567.0                          | $7.44 \times 10^{-36*}$ |
|                              | Progenitor | 3322.0                          | $2.59 \times 10^{-30*}$ |
|                              | Exemplar   | 1057.0                          | $2.10 \times 10^{-48*}$ |
|                              | Local      | 3171.0                          | $2.21 \times 10^{-31*}$ |
| Economics (prominent)        | kNN        | 740.0                           | $1.31 \times 10^{-16*}$ |
|                              | Prototype  | 888.0                           | $1.69 \times 10^{-14*}$ |
|                              | Progenitor | 1406.0                          | $2.40 \times 10^{-8*}$  |
|                              | Exemplar   | 592.0                           | $7.09 \times 10^{-19*}$ |
|                              | Local      | 962.0                           | $1.69 \times 10^{-13*}$ |
| Computer Science (Prominent) | kNN        | 621.0                           | $5.86 \times 10^{-16*}$ |
|                              | Prototype  | 621.0                           | $5.86 \times 10^{-16*}$ |
|                              | Progenitor | 759.0                           | $7.96 \times 10^{-14*}$ |
|                              | Exemplar   | 345.0                           | $9.86 \times 10^{-21*}$ |
|                              | Local      | 1104.0                          | $3.15 \times 10^{-9*}$  |
| Physics (random)             | kNN        | 4788.0                          | $6.48 \times 10^{-30*}$ |
|                              | Prototype  | 5544.0                          | $4.01 \times 10^{-25*}$ |
|                              | Progenitor | 5712.0                          | $3.19 \times 10^{-24*}$ |
|                              | Exemplar   | 3024.0                          | $9.65 \times 10^{-41*}$ |
|                              | Local      | 4536.0                          | $6.75 \times 10^{-31*}$ |
| Chemistry (random)           | kNN        | 2700.0                          | $1.19 \times 10^{-19*}$ |
|                              | Prototype  | 2340.0                          | $1.88 \times 10^{-22*}$ |
|                              | Progenitor | 2460.0                          | $1.89 \times 10^{-21*}$ |
|                              | Exemplar   | 1140.0                          | $7.85 \times 10^{-34*}$ |
|                              | Local      | 2580.0                          | $1.79 \times 10^{-20*}$ |
| Medicine (random)            | kNN        | 3699.5                          | $5.97 \times 10^{-28*}$ |
|                              | Prototype  | 5964.5                          | $8.66 \times 10^{-15*}$ |
|                              | Progenitor | 4605.5                          | $4.55 \times 10^{-22*}$ |
|                              | Exemplar   | 2944.5                          | $4.12 \times 10^{-33*}$ |
|                              | Local      | 4152.5                          | $7.60 \times 10^{-25*}$ |
| Economics (random)           | kNN        | 925.0                           | $4.57 \times 10^{-14*}$ |
|                              | Prototype  | 1665.0                          | $5.17 \times 10^{-6*}$  |
|                              | Progenitor | 1221.0                          | $2.25 \times 10^{-10*}$ |
|                              | Exemplar   | 629.0                           | $2.16 \times 10^{-18*}$ |
|                              | Local      | 703.0                           | $2.99 \times 10^{-17*}$ |
| Computer Science (Random)    | kNN        | 931.5                           | $1.38 \times 10^{-11*}$ |
|                              | Prototype  | 724.5                           | $2.01 \times 10^{-14*}$ |
|                              | Progenitor | 1138.5                          | $7.16 \times 10^{-9*}$  |
|                              | Exemplar   | 517.5                           | $9.05 \times 10^{-18*}$ |
|                              | Local      | 724.5                           | $2.01 \times 10^{-14*}$ |
