**S5 Table: Percentage breakdowns from winner-take-all analyses.**

|                              | kNN   | Prototype | Progenitor | Exemplar     | Local | Null |
|------------------------------|-------|-----------|------------|--------------|-------|------|
| Physics (prominent)          | 7.7%  | 1.2%      | 40.5%      | <b>45.2%</b> | 3.0%  | 2.4% |
| Chemistry (prominent)        | 5.8%  | 0.8%      | 30.8%      | <b>58.3%</b> | 1.7%  | 2.5% |
| Medicine (prominent)         | 2.6%  | 2.0%      | 22.5%      | <b>70.9%</b> | 0.7%  | 1.3% |
| Economics (prominent)        | 17.6% | 0%        | 24.3%      | <b>51.4%</b> | 4.1%  | 2.7% |
| Computer Science (prominent) | 37.7% | 1.4%      | 10.1%      | <b>44.9%</b> | 4.3%  | 1.4% |
| Physics                      | 13.6% | 1.1%      | 24.9%      | <b>52.0%</b> | 1.7%  | 6.8% |
| Chemistry                    | 8.3%  | 1.1%      | 29.4%      | <b>58.3%</b> | 1.1%  | 1.7% |
| Medicine                     | 7.3%  | 0%        | 34.0%      | <b>50.6%</b> | 3.7%  | 4.9% |
| Economics                    | 7.1%  | 0.0%      | 33.3%      | <b>49.5%</b> | 7.1%  | 3.0% |
| CS                           | 14.8% | 0.0%      | 34.6%      | <b>45.7%</b> | 0.0%  | 4.9% |
